# Supplementary material for: Preventing Lower Limb Graft Thrombosis after Infrainguinal Arterial Bypass Surgery with Antithrombotic Agents (PATENT Study): An International Expert Based Delphi Consensus
Source: MDPI journal article supplement (doi:10.3390/jcm12093223), 2023-04-30
Supplement: s1 [file jcm-2294202-supplementary.pdf › jcm-2294202-supplementary.pdf]

**Supplementary Table S1.** Expert group and institutional experience

| <b>Characteristics of experts and their institutions</b>               | <b>Total Round 1<br/>n=39</b>                                | <b>Total Round 1-4<br/>n=28</b>                              |
|------------------------------------------------------------------------|--------------------------------------------------------------|--------------------------------------------------------------|
| <b>Country of residence:</b>                                           |                                                              |                                                              |
| Germany                                                                | 7 (18%)                                                      | 4 (14%)                                                      |
| Austria                                                                | 5 (13%)                                                      | 3 (11%)                                                      |
| Switzerland                                                            | 5 (13%)                                                      | 4 (14%)                                                      |
| Sweden                                                                 | 4 (10%)                                                      | 3 (11%)                                                      |
| Greece                                                                 | 2 (5%)                                                       | 2 (7%)                                                       |
| Italy                                                                  | 2 (5%)                                                       | 2 (7%)                                                       |
| Netherlands                                                            | 2 (5%)                                                       | 2 (7%)                                                       |
| United Kingdom                                                         | 1 (3%)                                                       | 1 (4%)                                                       |
| Belgium                                                                | 1 (3%)                                                       | 1 (4%)                                                       |
| Croatia                                                                | 1 (3%)                                                       | 1 (4%)                                                       |
| Malta                                                                  | 2 (5%)                                                       | 1 (4%)                                                       |
| France                                                                 | 2 (5%)                                                       | 1 (4%)                                                       |
| Hungary                                                                | 1 (3%)                                                       | 1 (4%)                                                       |
| Romania                                                                | 1 (3%)                                                       | 1 (4%)                                                       |
| Spain                                                                  | 1 (3%)                                                       | 1 (4%)                                                       |
| Denmark                                                                | 1 (3%)                                                       | -                                                            |
| Finland                                                                | 1 (3%)                                                       | -                                                            |
| <b>Medical speciality:</b>                                             |                                                              |                                                              |
| Vascular Surgery                                                       | 35 (90%)                                                     | 25 (89%)                                                     |
| Angiology                                                              | 3 (8%)                                                       | 2 (7%)                                                       |
| Interventional Cardiology                                              | 1 (3%)                                                       | 1 (4%)                                                       |
| <b>Institutional experience by type of procedure (caseload / year)</b> |                                                              |                                                              |
| Above-the-knee popliteal artery bypass, median (Q1 to Q3)              | 29 (19 to 50)                                                | 26 (19 to 52)                                                |
| Below-the-knee popliteal artery bypass, median (Q1 to Q3)              | 50 (29 to 71)                                                | 38 (24 to 61)                                                |
| Distal bypass, median (Q1 to Q3)                                       | 20 (10 to 26)                                                | 20 (10 to 24)                                                |
| <b>Preferred graft material*</b>                                       |                                                              |                                                              |
| Above-the-knee popliteal artery                                        | 1. Autologous (31)<br>2. Prosthetic (8)<br>3. Biological (0) | 1. Autologous (21)<br>2. Prosthetic (7)<br>3. Biological (0) |
| Below-the-knee popliteal artery                                        | 1. Autologous (35)<br>2. Prosthetic (2)<br>3. Biological (1) | 1. Autologous (26)<br>2. Prosthetic (2)<br>3. Biological (0) |
| Distal                                                                 | 1. Autologous (38)<br>2. Prosthetic (1)<br>3. Biological (0) | 1. Autologous (28)<br>2. Prosthetic (0)<br>3. Biological (0) |

Data are presented as n (%) or median (Q1 = quartile 1 to Q3 = quartile 3) for institutional caseload.

\* Preferred graft material presented as ranks (1. - 3.) with number of votes in brackets. One expert did not choose a preferred graft material for below-the-knee popliteal artery bypass.
